# Supplementary material for: Intraoperative REBOA: an analysis of the American Association for the Surgery of Trauma AORTA registry
Source: PubMed Central journal article supplement — Trauma Surg Acute Care Open. 2019 Nov 11;4(1):e000340. doi: 10.1136/tsaco-2019-000340 (PMC6861115; doi:10.1136/tsaco-2019-000340), 2019-11-11
Supplement: tsaco-2019-000340supp001.pdf [file tsaco-2019-000340supp001.pdf]

**Supplement 1:** Multivariate Logistic Regression Analysis on the Outcome of In-hospital Mortality (including “time to definitive hemorrhage control”)

|                                       | OR     | 95% CI |          | p-value |
|---------------------------------------|--------|--------|----------|---------|
| Time to definitive hemorrhage control | 1.001  | 0.993  | 1.01     | 0.883   |
| Admission time to successful AO       | 0.996  | 0.968  | 1.024    | 0.770   |
| Admission GCS                         | 0.836  | 0.732  | 0.955    | 0.008   |
| Admission HR                          | 1.027  | 1.005  | 1.050    | 0.017   |
| Admission SBP                         | 1.006  | 0.984  | 1.028    | 0.593   |
| ISS                                   | 1.071  | 1.017  | 1.129    | 0.010   |
| Age                                   | 1.077  | 1.027  | 1.130    | 0.002   |
| Admission lactate                     | 1.131  | 0.988  | 1.295    | 0.073   |
| CPR                                   | 51.270 | 2.360  | 1113.876 | 0.012   |
| Location of AO (OR)                   | 2.846  | 0.328  | 24.659   | 0.343   |

**Supplement 1** - Multivariate logistic regression analysis on the outcome of in-hospital mortality (includes “time to definitive hemorrhage control”). ISS = Injury Severity Score; AO = aortic occlusion. Observations = 74.
